# Supplementary material for: Cancer screening programs in South-east Asia and Western Pacific
Source: BMC Health Serv Res. 2024 Jan 18;24:102. doi: 10.1186/s12913-023-10327-8 (PMC10797973; doi:10.1186/s12913-023-10327-8)
Supplement: Supplementary file 1 — Supplementary Material 1 [file 12913_2023_10327_MOESM1_ESM.xlsx]

## Sheet: Sheet1
Kui Son Choi, Professor
Republic of Korea
Essential criteria
1. Cancer screening programme has a protocol/guideline describing at least the target population, screening intervals, screening tests, referral pathway, management of positive casesa	yes
2. There is a system in place for identifying the target population	yes	All citizens are covered by National Health Insurance and the National Health Insurance Service (NHIS) is responsible for sending the invitation letter. The target population is selected at the beginning of each year and invited by mail.
3. There is a system in place for inviting eligible individuals for screening	yes
4. Cancer screening programme has a policy framework from the health authorities defining governance structure, financing, goals and objectives of the programmea	yes
5. Performance of screening programme should be evaluated with appropriate indicators	yes
6. The protocol/guideline should at least describe: monitoring and evaluation	yes
7. There is a system in place for notifying the results and informing about follow up	yes	Cancer screening centres sends text messages or phone call to those with a positive screening test result.
8. There is a system in place for sending recall notice to the non-compliant individuals	yes	NHIS is encouraging people to undergo screening by sending text messages. Public Health Centers monitor participation rates and arctively encourage eiligible individuals to participate in the screening programme.
9. Auditing of the programme	yes	In 2008, the Ministry of Health and Welfare launched the National Quality Improvement Program (NQIP) for KNCSP, which aims to ensure high-quality screening tests. The audit focuses on screening centers/units and assesses their facilities, equipment, health professionals, screening processes, notification of screening results, the accuracy of those results, etc. It also evaluates whether the scree…
10. A specified team/organization is responsible for quality assurance/ improvement	yes	Quality of the program is evaluated every three years.
11. Performance of cancer screening programme is evaluated, published and widely disseminated on a regular basisa	yes	Program performance is monitored annually and reported to Ministry of Health and Welfare.
12. All activities along the screening pathway are planned, coordinated and evaluated through a quality improvement framework (quality assurance)	yes
13. An evidence-based protocol/guideline developed in consensus with majority of stakeholders	yes
14. An information system exists with appropriate linkages (between population databases, screening information, cancer registry, etc.) for screening implementation and evaluation	yes	A national cancer screening database is being established in Korea, and cancer registration data, claim data, and death data can be linked using resident registration numbers.
15. The screening programme has a provision of continued training for service providers	yes	Clinics, hospitals, and specific screening facilities voluntarily apply to be certified as an institution for the KNCSP. They are designated by the Ministry of Health and Welfare if their equipment, facility, and personnel qualification criteria satisfy the required criteria. Health professionals who conduct screening procedures at screening centers do not require particular qualification standar…
16. Performance of screening programme should be evaluated with reference standards for the indicators	yes
Derived from Zhang et al, BMC Medicne, 2022
