# Supplementary material for: Cancer screening programs in South-east Asia and Western Pacific
Source: BMC Health Serv Res. 2024 Jan 18;24:102. doi: 10.1186/s12913-023-10327-8 (PMC10797973; doi:10.1186/s12913-023-10327-8)
Supplement: Supplementary file 6 — Supplementary Material 6 [file 12913_2023_10327_MOESM6_ESM.xlsx]

## Sheet: Sheet1
Wee Hwee Lin, Associate Professor
Country: Singapore
Essential criteria
1. Cancer screening programme has a protocol/guideline describing at least the target population, screening intervals, screening tests, referral pathway, management of positive casesa	Yes
2. There is a system in place for identifying the target population	Yes
3. There is a system in place for inviting eligible individuals for screening	No	Only at population level, no personal invitations
4. Cancer screening programme has a policy framework from the health authorities defining governance structure, financing, goals and objectives of the programmea	Yes
5. Performance of screening programme should be evaluated with appropriate indicators	Yes	The set of indicators is not in public domain, but is tracked by the programme owner.
6. The protocol/guideline should at least describe: monitoring and evaluation	Yes	At Programme level, as stipulated in the programme Audit guidelines and standards
7. There is a system in place for notifying the results and informing about follow up	Yes
8. There is a system in place for sending recall notice to the non-compliant individuals	Partially	At Programme level
9. Auditing of the programme	Yes
10. A specified team/organization is responsible for quality assurance/ improvement	Yes	The Health Promotion Board (HPB) as the Programme owner and implementer of the national programme is responsible.
11. Performance of cancer screening programme is evaluated, published and widely disseminated on a regular basis	Partially	The performance will be evaluated and shared internally within HPB and with MOH. Not published publicly
12. All activities along the screening pathway are planned, coordinated and evaluated through a quality improvement framework (quality assurance)	Yes	Health Promotion Board (HPB), as the Programme owner and implementer of the national programme, coordinates the end-to-end processes across the entire screening journey. These processes are evaluated by the quality assurance framework for the programmes.
13. An evidence-based protocol/guideline developed in consensus with majority of stakeholders	Yes	There is a national level Screening Test Review Committee.
14. An information system exists with appropriate linkages (between population databases, screening information, cancer registry, etc.) for screening implementation and evaluation	No
15. The screening programme has a provision of continued training for service providers	Yes	There are multi-disciplinary training organised for service providers (e.g. BreastScreen Singapore Seminar once in 2 years) and training courses for nurses (for performing cervical cancer screening at polyclinics). Service providers are also required to organise training sessions for their staff as stipulated within the scope of the Programme and under the QA framework
16. Performance of screening programme should be evaluated with reference standards for the indicators	Yes
Derived from Zhang et al, BMC Medicne, 2022
